# Supplementary material for: Dual RNA-Seq Analysis Reveals Transcriptome Effects during the Salmon–Louse Interaction in Fish Immunized with Three Lice Vaccines
Source: MDPI journal article supplement (doi:10.3390/vaccines10111875), 2022-11-07
Supplement: s1 [file s1]

## Supplementary figures

A

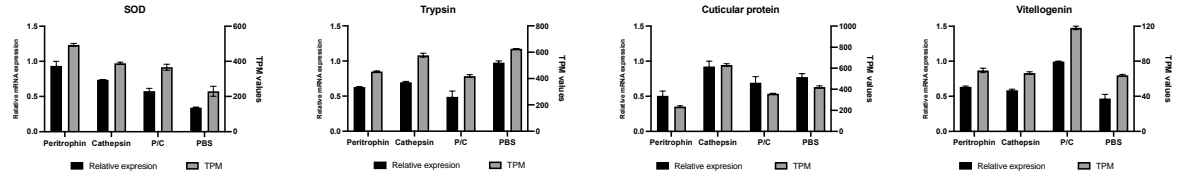

B

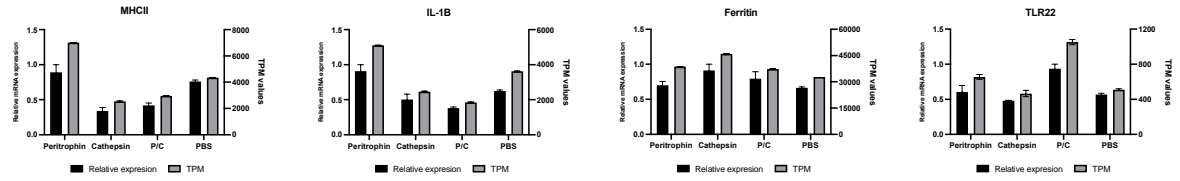

C

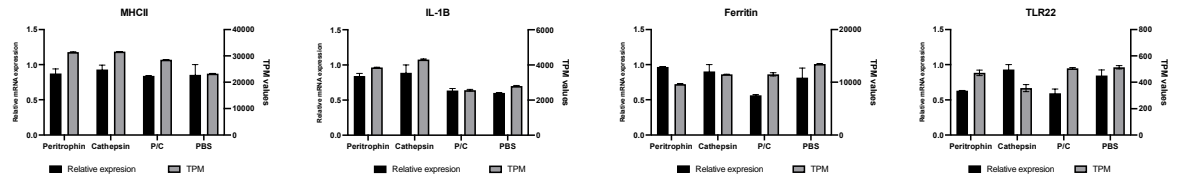

**Figure S1.** RT-qPCR validation of genes expressed in immunized *Salmo salar* and exposed sea lice. A) RT-qPCR validation of genes expressed in sea lice. B) RT-qPCR validation of genes expressed in *S. salar* skin tissue. C) RT-qPCR validation of genes expressed in *S. salar* head kidney tissue.



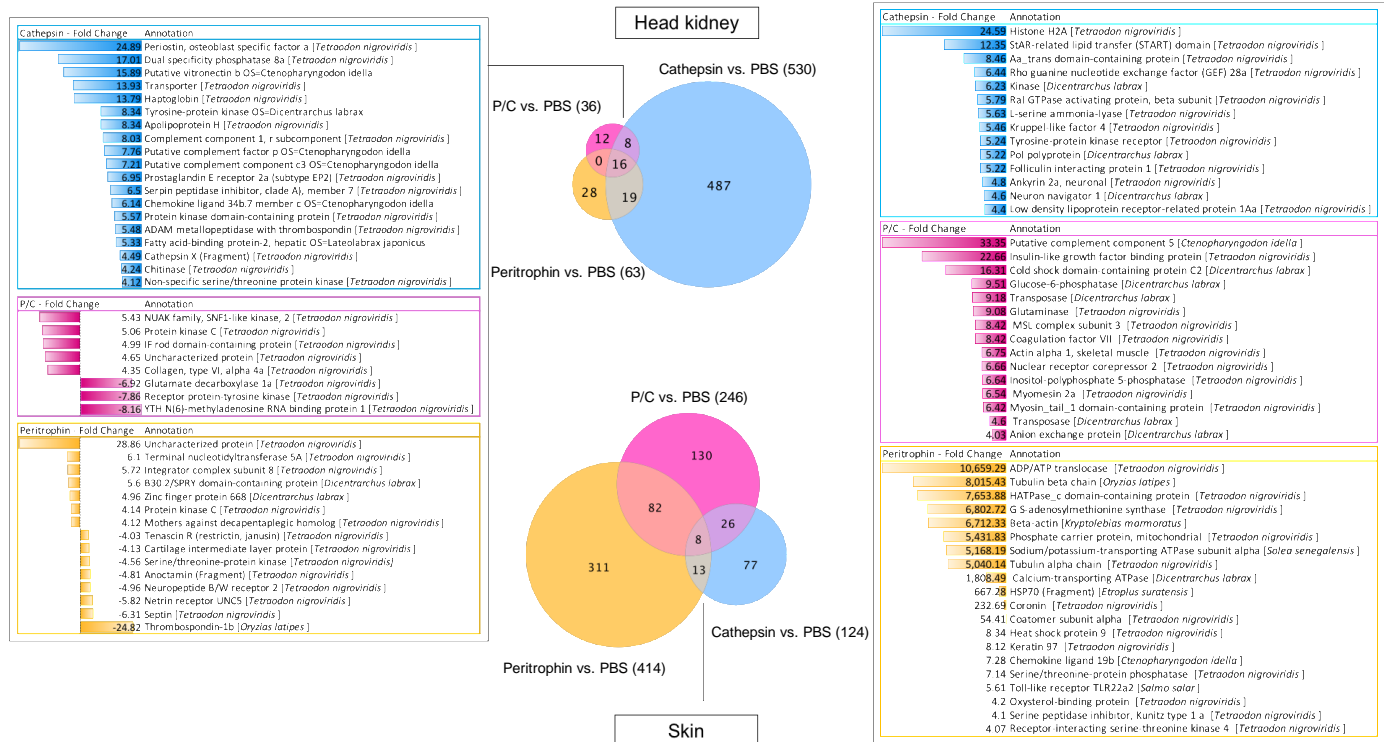

**Figure S3.** Differential expression analysis of genes associated with chromosomal regions with CGE = 100% in vaccinated Atlantic salmon. Venn diagram showing the distribution of contigs differentially expressed. Colored bars indicate the genes fold change: cathepsin in blue, peritrophin in yellow, and purple for the P/C combination.

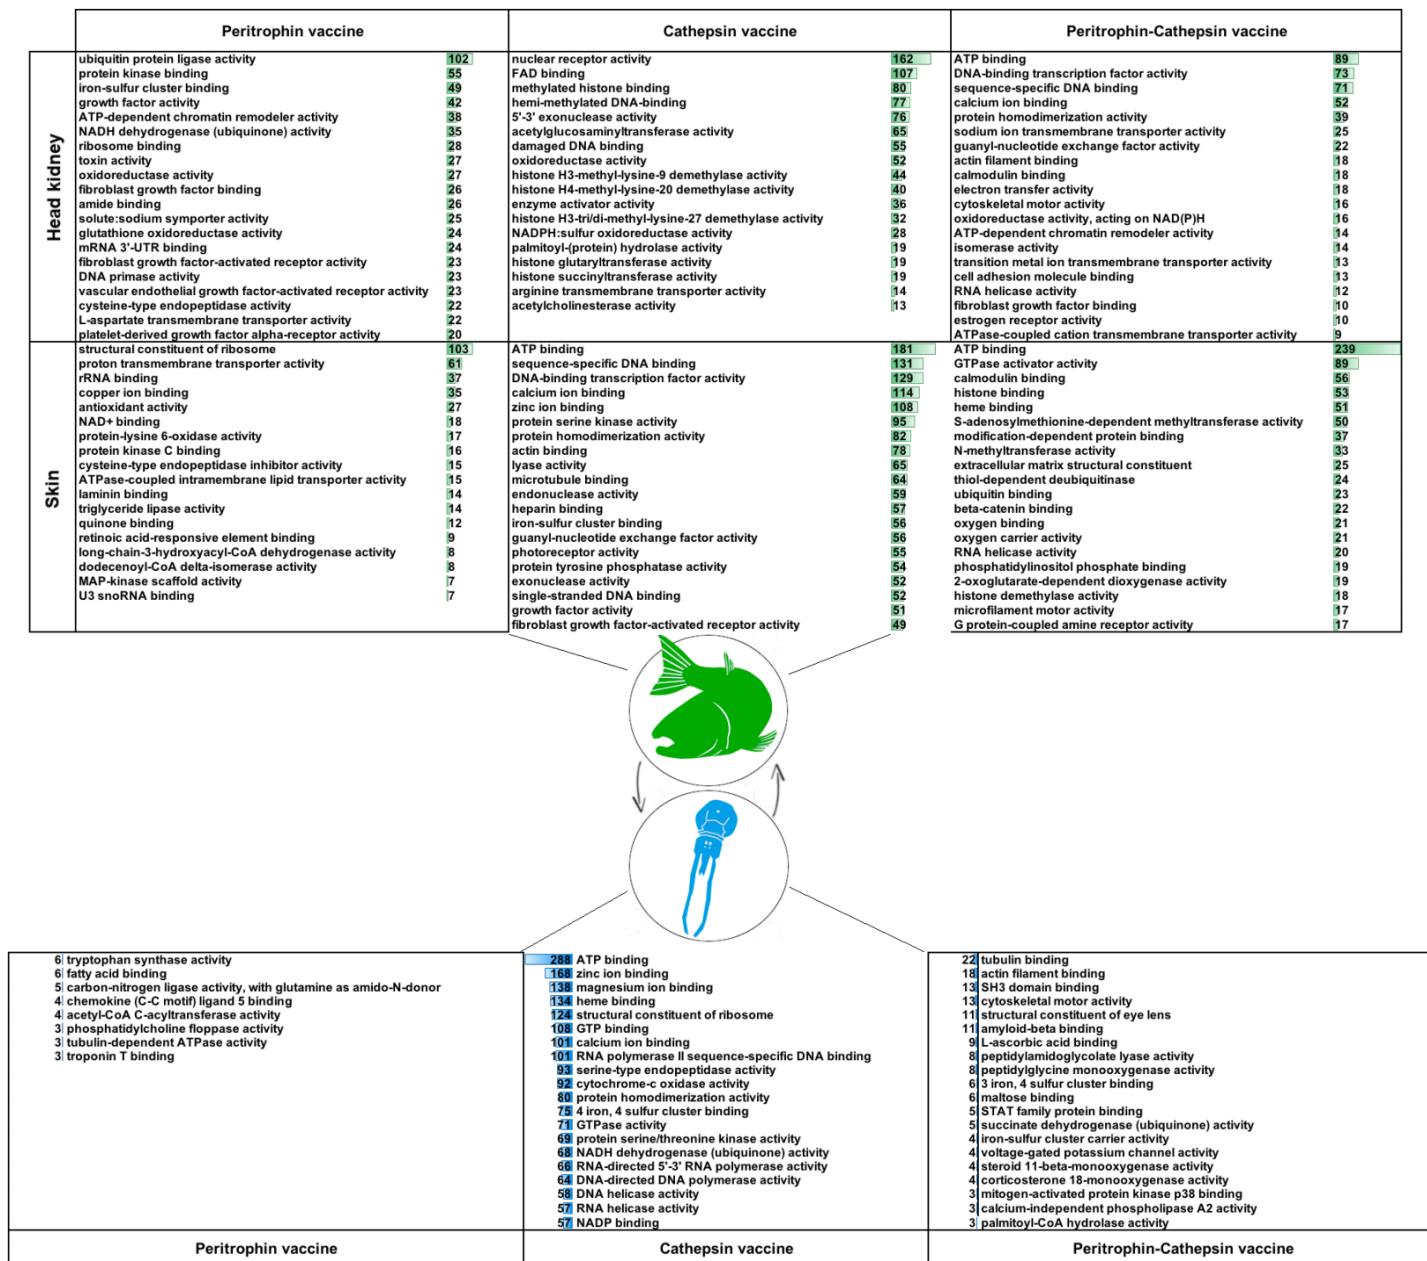

**Figure S4.** GO annotation of Molecular Function identifies in genes differentially expressed in vaccinated *S. salar* and *C. rogercresseyi* collected from vaccinated fish. Bars indicate the number of hits for the GO categories.

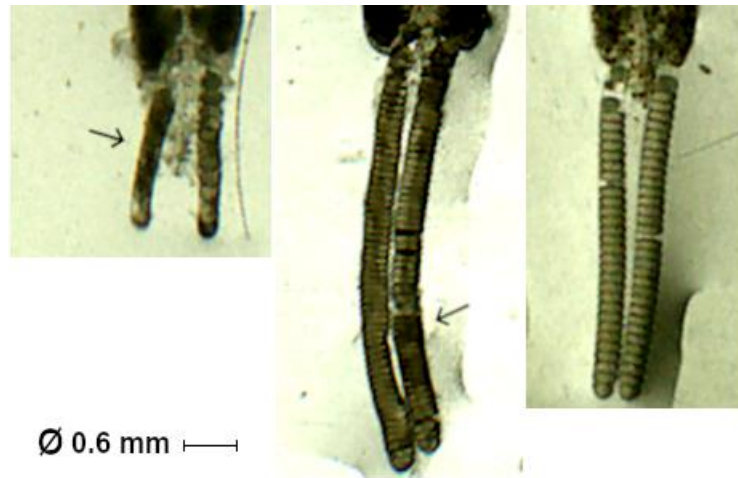

**Figure S5.** Phenotypic malformations of female *Caligus rogercresseyi* exposed to (A) cathepsin, (B) peritrophin, and (C) PBS-vaccinated fish. Images were taken under the same conditions with a 2X objective lens. The arrows indicate alterations concerning the control groups. The scale of 0.6 mm indicated by the black circle is equivalent in all the images of the figure
