# Supplementary material for: Dual RNA-Seq Analysis Reveals Transcriptome Effects during the Salmon–Louse Interaction in Fish Immunized with Three Lice Vaccines
Source: MDPI journal article supplement (doi:10.3390/vaccines10111875), 2022-11-07
Supplement: s1 [file s1]

**Table S1.** Primers list used for RT-qPCR analysis.

| Organism                     | Primer Name     | Gene                                           | Sequence 5'-3'          | Tm | Efficiency (%) | Reference  |
|------------------------------|-----------------|------------------------------------------------|-------------------------|----|----------------|------------|
| <i>Salmo salar</i>           | EFa_F           | <i>Elongation factor-<br/>(reference gene)</i> | TGCTGGTGGTGTGGGTGAGT    | 60 | 95.18          | [19]       |
|                              | EFa_R           |                                                | CCTCAAACCGCTTCTGGCTGT   |    |                |            |
|                              | IL1B_F6         | <i>Interleukin-1B</i>                          | GATCTGGAGGTATCCCATCA    | 60 | 122,36         | [19]       |
|                              | IL1B_R6         |                                                | CACAGCACTCTCCAGCAAGA    |    |                |            |
|                              | MHCII_F         | <i>Major histocompatibility complex II</i>     | CTCCTCAAAGGACCTGCAGG    | 60 | 104,72         | [19]       |
|                              | MHCII_R         |                                                | TCAGGACCTTTGTTCCAGGC    |    |                |            |
|                              | TLR22_3_F       | <i>Toll-like recePtor 22</i>                   | TGCCTTCTAACCCCTCTCCCT   | 61 | 91,36          | [19]       |
|                              | TLR22_3_R       |                                                | CGCTGCTCTCAGACAGGAAG    |    |                |            |
|                              | FerritinM_F1    | <i>Ferritin M</i>                              | TATCACCACGATTGCGAAGC    | 60 | 102,66         | [19]       |
|                              | FerritinM_R1    |                                                | CTCGTCGCTGTTCTCCTTGA    |    |                |            |
| <i>Caligus rogercresseyi</i> | Cr_β-tubulin_2F | <i>β - tubulin<br/>(reference gene)</i>        | TTTGTTGTGTGAGCTCTGGG    | 60 | 92,8           | [15]       |
|                              | Cr_β-tubulin_2R |                                                | GCTGATCTCCGAAAACCTTGC   |    |                |            |
|                              | qCr_SOD_F       | <i>Superoxide dimutase</i>                     | TCCACATGCAACACGCGCTCCAG | 60 | 109.29         | [27]       |
|                              | qCr_SOD_R       |                                                | GCGTGCCCTGGTCGTACATGCCG |    |                |            |
|                              | CRtryp-58-F1    | <i>Trypsin</i>                                 | CAACTTCAGACCAAATGAC     | 60 | 99.8           | [27]       |
|                              | CRtryp-58-R1    |                                                | CATAGAGTTCGTGGTAGAT     |    |                |            |
|                              | conting56379_F1 | <i>Cuticle protein</i>                         | AATCCAAGTCCATCAGCGAC    | 58 | 100            | [16]       |
|                              | conting56379_F1 |                                                | CTCCAACATCAACTCTGCCA    |    |                |            |
|                              | Cr_Vit_F1       | <i>Vitellogenin</i>                            | GTCTGCCACGTTGAGAAGGA    | 58 | 113            | This study |
|                              | Cr_Vit_R1       |                                                | CGAGGAGTCCGAATCTGACG    |    |                |            |
